# Supplementary material for: Satellite (GOSAT-2 CAI-2) retrieval and surface (ARFINET) observations of Aerosol Black Carbon over India
Source: Copernicus journal article supplement (doi:10.5194/acp-2022-555), 2022-09-19
Supplement: Supplementary file 1 [file acp-2022-555-supplement.pdf]

## Supplementary Materials

**Table T1:** Network of aerosol observatories in the ARFINET and their regional classification.

| Region                                                           | Station Name       | Station Code | Latitude | Longitude |
|------------------------------------------------------------------|--------------------|--------------|----------|-----------|
| IGP –<br>Indo Gangetic Plains                                    | Agra               | AGR          | 27.18    | 78.02     |
|                                                                  | Delhi              | DEL          | 28.6     | 77.2      |
|                                                                  | Gorakhpur          | GKP          | 26.75    | 83.38     |
|                                                                  | Kanpur             | KNP          | 26.4     | 80.3      |
|                                                                  | Patiala            | PTL          | 30.33    | 76.46     |
|                                                                  | Ranchi             | RNC          | 23.23    | 85.23     |
|                                                                  | Varanasi           | VNS          | 25.3     | 82.96     |
| NEI –<br>North-Eastern India                                     | Agartala           | AGT          | 23.5     | 91.25     |
|                                                                  | Dibrugarh          | DBR          | 27.3     | 94.6      |
|                                                                  | Imphal             | IPH          | 24.75    | 93.92     |
|                                                                  | Kharagpur          | KGP          | 22.5     | 87.5      |
|                                                                  | Kolkata            | KKT          | 22.57    | 88.37     |
|                                                                  | Shillong           | SHN          | 25.6     | 91.91     |
| NWI –<br>North-Western India                                     | Ahmedabad          | AHM          | 23.1     | 72.6      |
|                                                                  | Jaisalmer          | JSL          | 26.92    | 70.95     |
|                                                                  | Naliya             | NAL          | 22.23    | 68.69     |
|                                                                  | Rajkot             | RJK          | 22.3     | 70.73     |
|                                                                  | Udaipur            | UDP          | 24.6     | 73.9      |
| HIM –<br>Himalayan, sub-Himalayan<br>and foot-hills of Himalayas | Dehradun           | DDN          | 30.34    | 78.04     |
|                                                                  | Hanle              | HNL          | 32.78    | 78.95     |
|                                                                  | Kullu              | KLU          | 31.9     | 77.1      |
|                                                                  | Lachung            | LCN          | 27.4     | 88.74     |
|                                                                  | Nainital           | NTL          | 29.2     | 79.3      |
|                                                                  | Tawang             | TWG          | 27.59    | 91.87     |
| CI –<br>Central India                                            | Nagpur             | NGP          | 21.15    | 79.15     |
|                                                                  | Bhubaneshwar       | BBR          | 20.2     | 85.8      |
| PI –<br>Peninsular India                                         | Anantapur          | ATP          | 14.46    | 77.67     |
|                                                                  | Bangalore          | BLR          | 12.97    | 77.59     |
|                                                                  | Challakere         | CHK          | 14.32    | 76.65     |
|                                                                  | Chennai            | CHN          | 12.7     | 79.92     |
|                                                                  | Goa                | GOA          | 15.46    | 73.83     |
|                                                                  | Hyderabad          | HYD          | 17.47    | 78.58     |
|                                                                  | Kadappa            | KDP          | 14.46    | 78.81     |
|                                                                  | Ooty               | OTY          | 11.4     | 76.7      |
|                                                                  | Ponmudi            | PMD          | 8.8      | 77.1      |
|                                                                  | Pune               | PUN          | 18.54    | 73.85     |
|                                                                  | Thiruvananthapuram | TVM          | 8.5      | 77        |
|                                                                  | Vijayawada         | VJD          | 16.44    | 80.62     |
|                                                                  | Visakhapatnam      | VSK          | 17.7     | 83.1      |
| IL – Island Location                                             | Port-Blair         | PBR          | 11.64    | 92.71     |

5 **Table T2: Statistical fit parameters between satellite-retrieved ( $BC_{SAT}$ , 1 x 1-degree horizontal grid) and near-surface BC ( $BC_{SUR}$ , climatological monthly average values at different stations during 13:00 – 14:00 hrs. local time for the period 2015-2019) concentrations at different months.**

|     | <b>R</b> | <b>slope</b>    | <b>intercept</b> | <b>RMSE</b> | <b>N</b> |
|-----|----------|-----------------|------------------|-------------|----------|
| Dec | 0.36     | $0.39 \pm 0.22$ | $2.36 \pm 0.64$  | 1.68        | 25       |
| Jan | 0.46     | $1.23 \pm 0.53$ | $0.49 \pm 1.25$  | 2.30        | 23       |
| Feb | 0.68     | $0.98 \pm 0.21$ | $-0.43 \pm 0.61$ | 1.46        | 28       |
| Mar | 0.74     | $1.31 \pm 0.23$ | $-0.97 \pm 0.62$ | 1.46        | 29       |
| Apr | 0.61     | $1.17 \pm 0.30$ | $-0.97 \pm 0.76$ | 1.65        | 29       |
| May | 0.79     | $0.66 \pm 0.12$ | $-0.04 \pm 0.21$ | 0.43        | 26       |
| Jun | 0.60     | $1.12 \pm 0.34$ | $0.22 \pm 0.41$  | 0.78        | 26       |
| Jul | 0.63     | $3.02 \pm 0.77$ | $0.29 \pm 0.92$  | 2.32        | 27       |
| Aug | 0.60     | $2.13 \pm 0.63$ | $1.22 \pm 0.68$  | 1.58        | 24       |

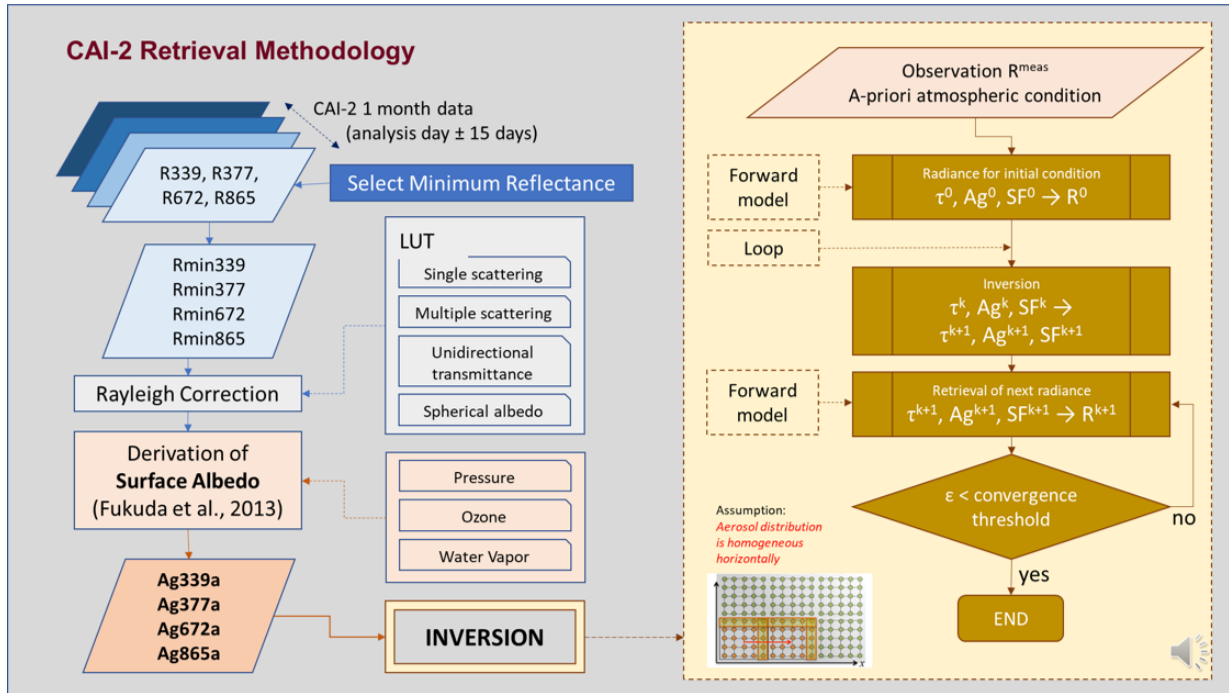

Figure S1: Flowchart of CAI-2 L2 pre-processing algorithm (GOSAT-2 project: GOSAT-2/CAI-2 Level-2 Preprocessing Theoretical Basis Document - ATBD).

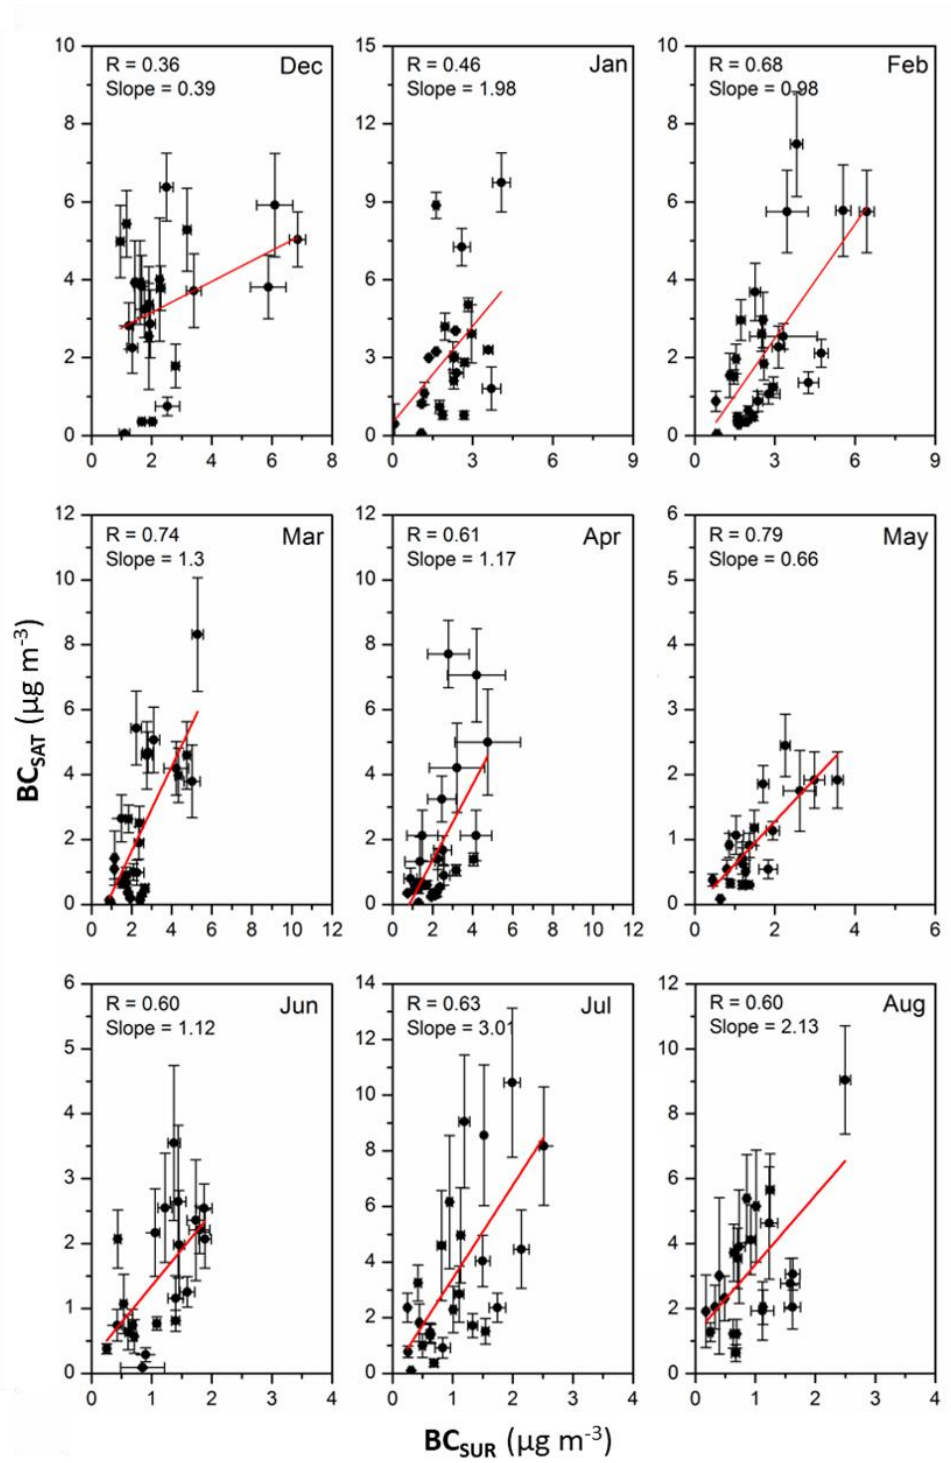

Figure S2: Comparison of monthly average BC from satellite (averaged over 1 x 1-degree area around each of the ARFINET sites) and surface measurements (during 13:00-14:00 hrs. local time for the period 2015-2019) at different locations during DJF, MAM and JJA. The solid red line is the linear fit of  $BC_{SAT}$  and  $BC_{SUR}$ .

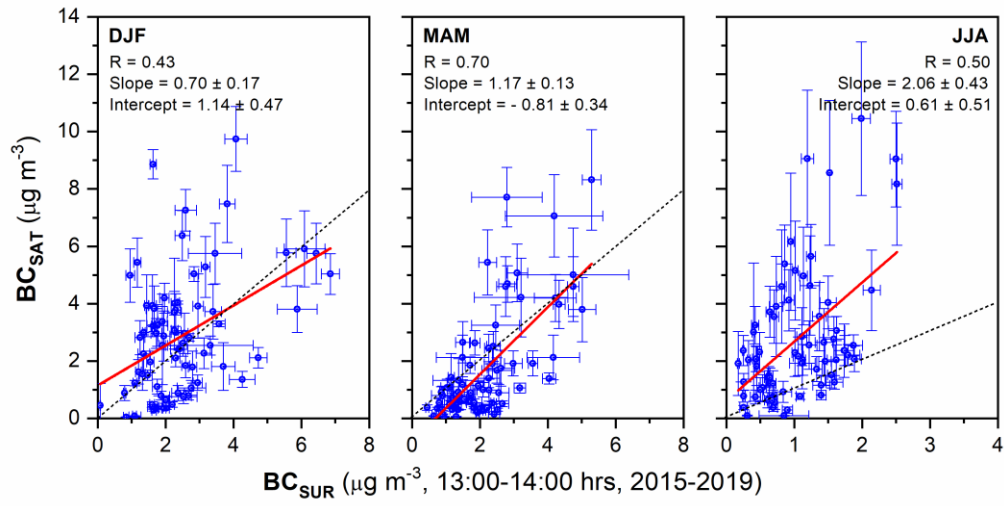

25 **Figure S3: Comparison of monthly average satellite BC (1 x 1-degree area average values around each of the point locations in the ARFINET) with surface BC (during 13:00-14:00 hrs. local time for the period 2015-2019) at different seasons, representing winter, pre-monsoon and monsoon. The solid red line is the linear fit, and the grey dash line is the one-to-one line of  $BC_{SAT}$  and  $BC_{SUR}$ .**

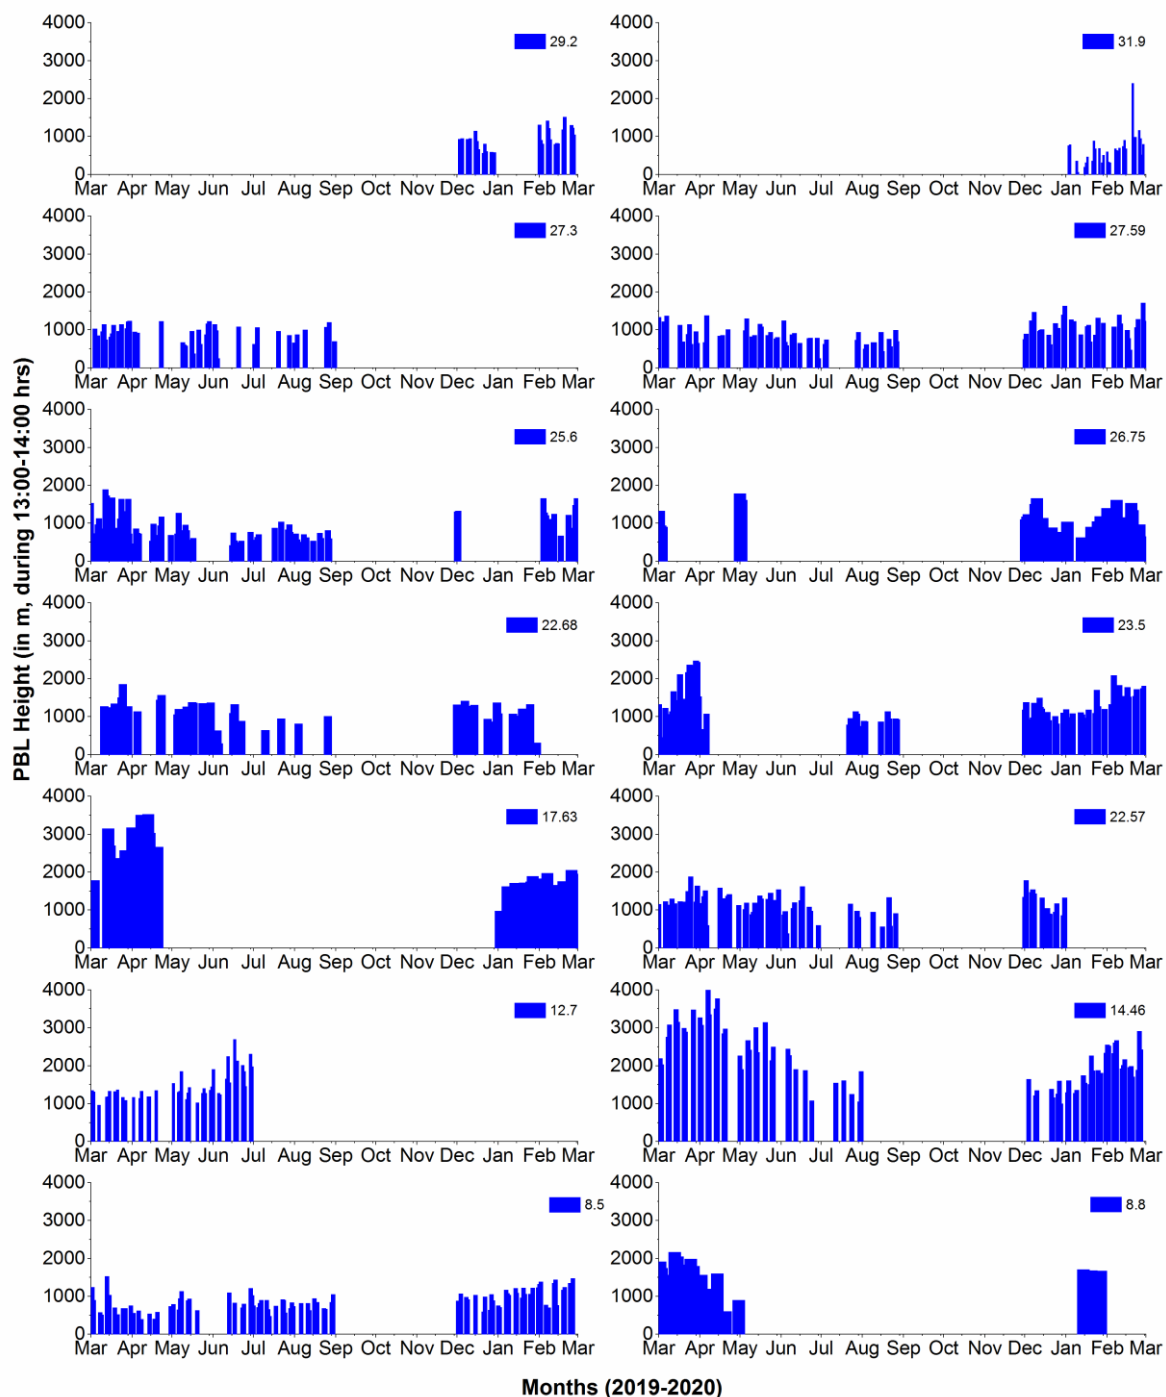

30

**Figure S4: Day to day variability of planetary boundary layer (PBL) height (in m) over different locations of India. The days shown here correspond to the days of simultaneous measurements of BC from satellite and surface.**

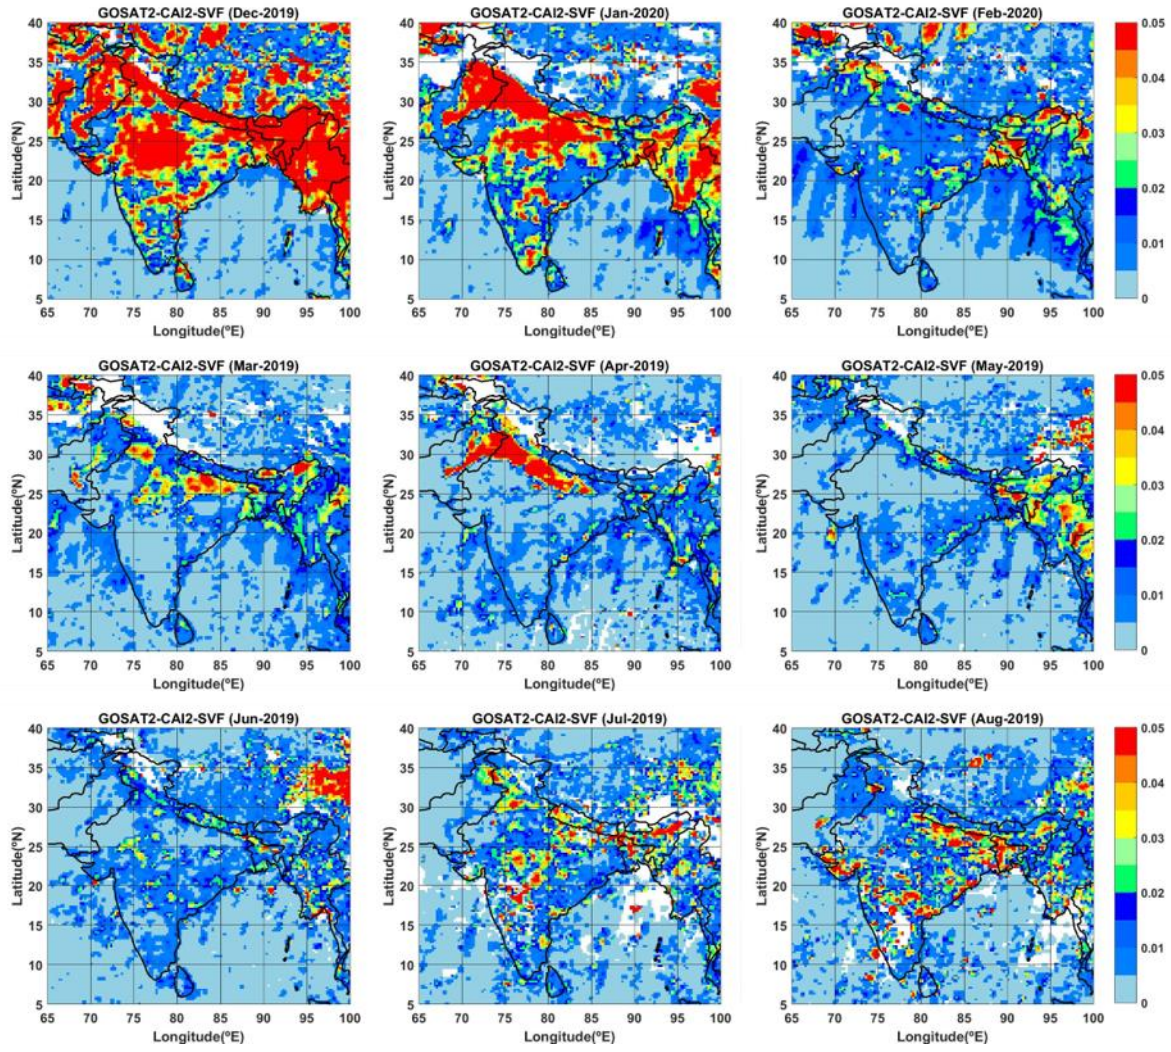

Figure S5: Regional distribution (monthly average) of soot volume fraction (SVF) during DJF, MAM and JJA.



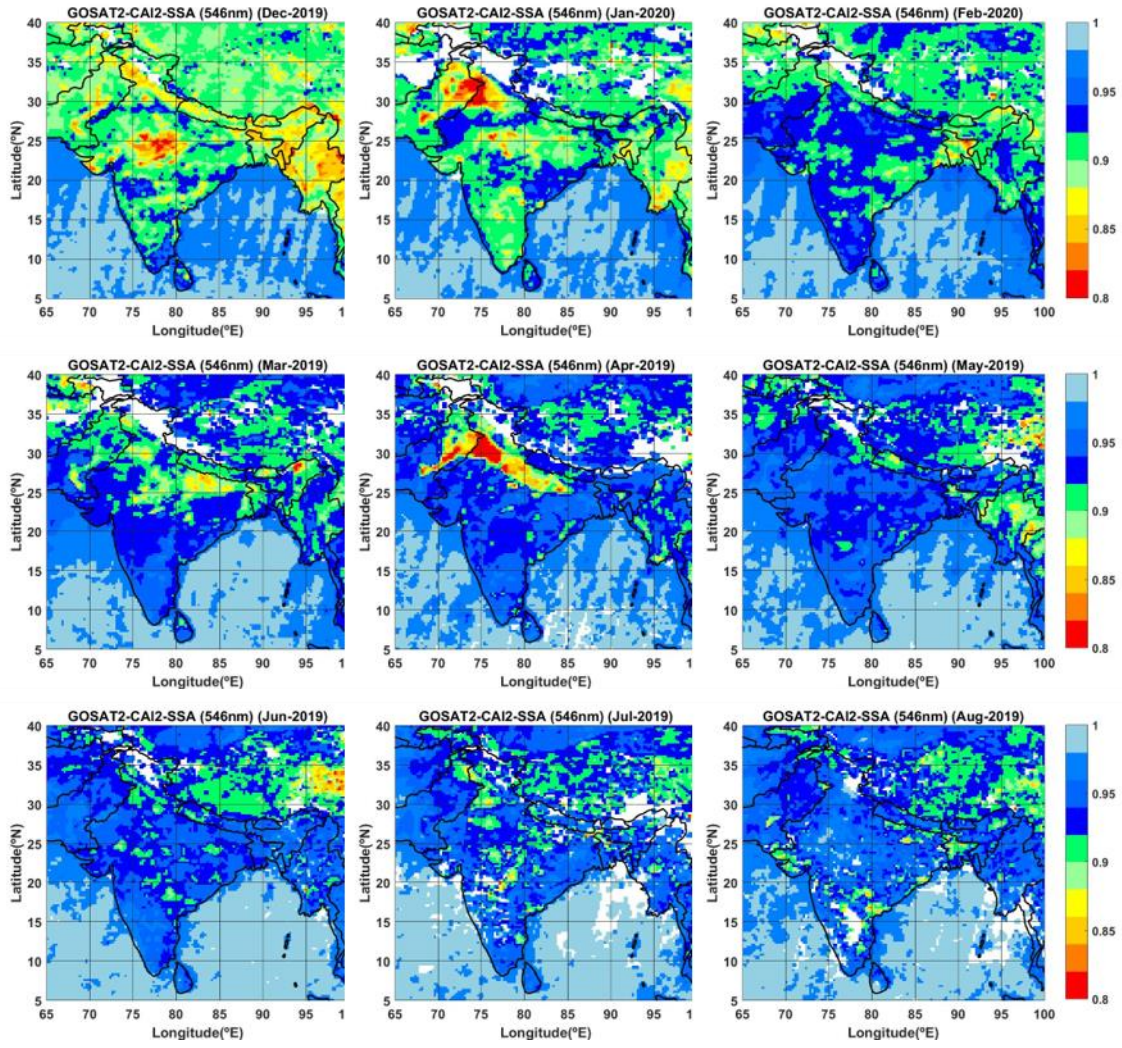

Figure S6: Regional map (monthly average) of aerosol single scattering albedo (SSA) at 546 nm during DJF, JJA and MAM.



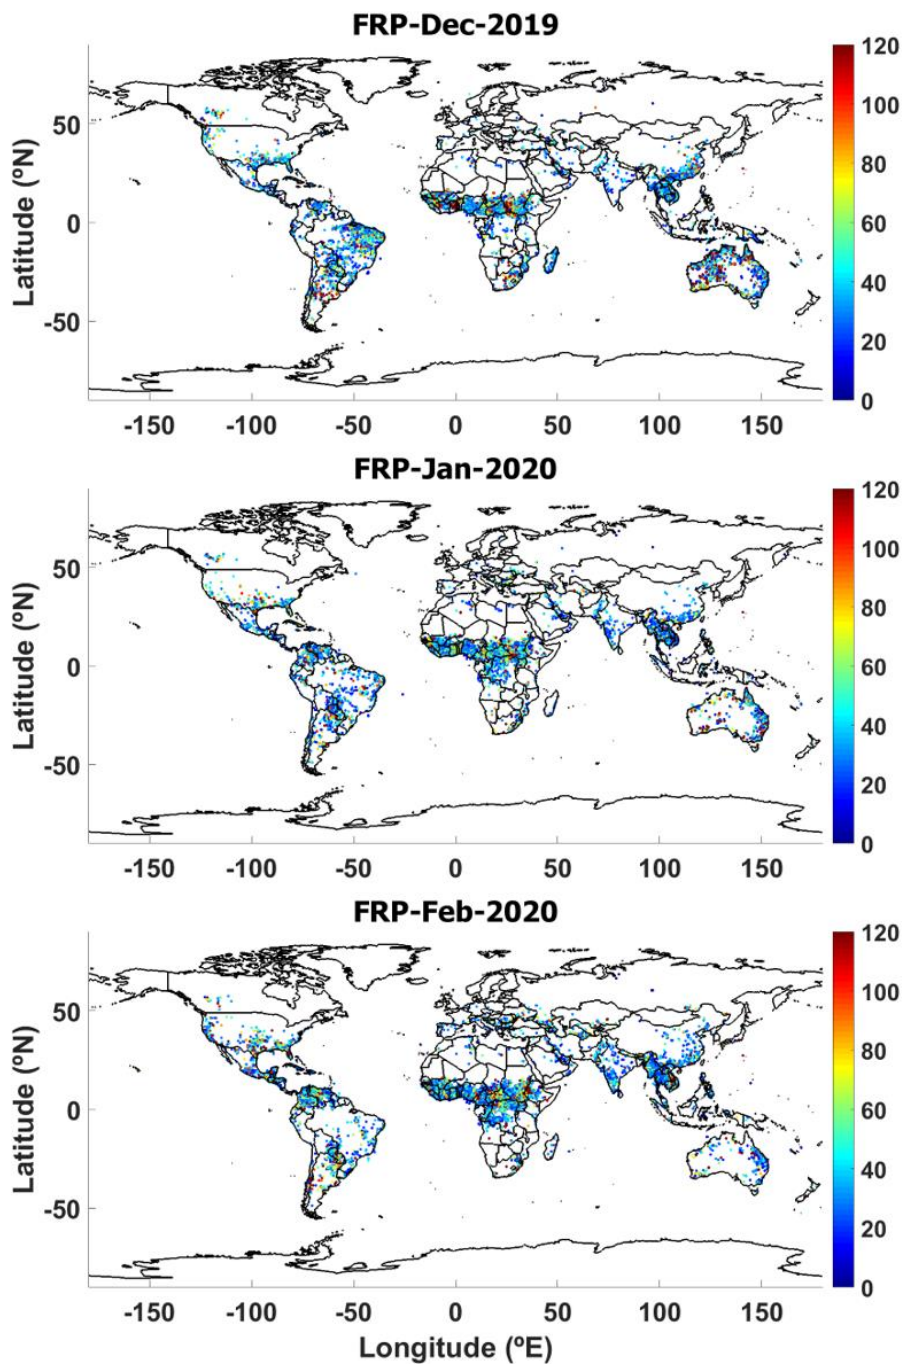

Figure S7: Fire radiative power (FRP, in MW) during DJF.

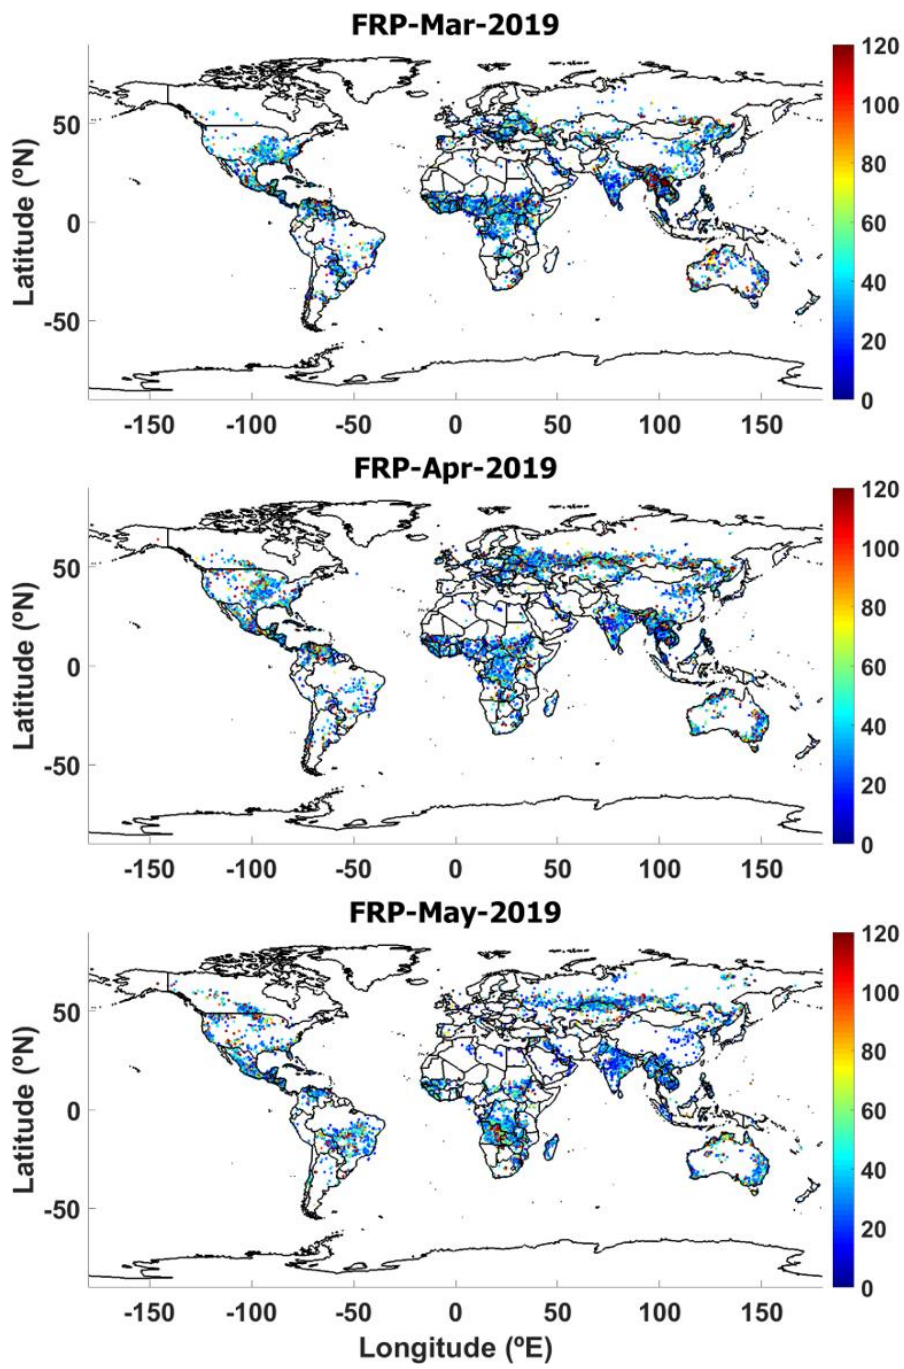

Figure S8: Fire radiative power (FRP, in MW) during MAM.

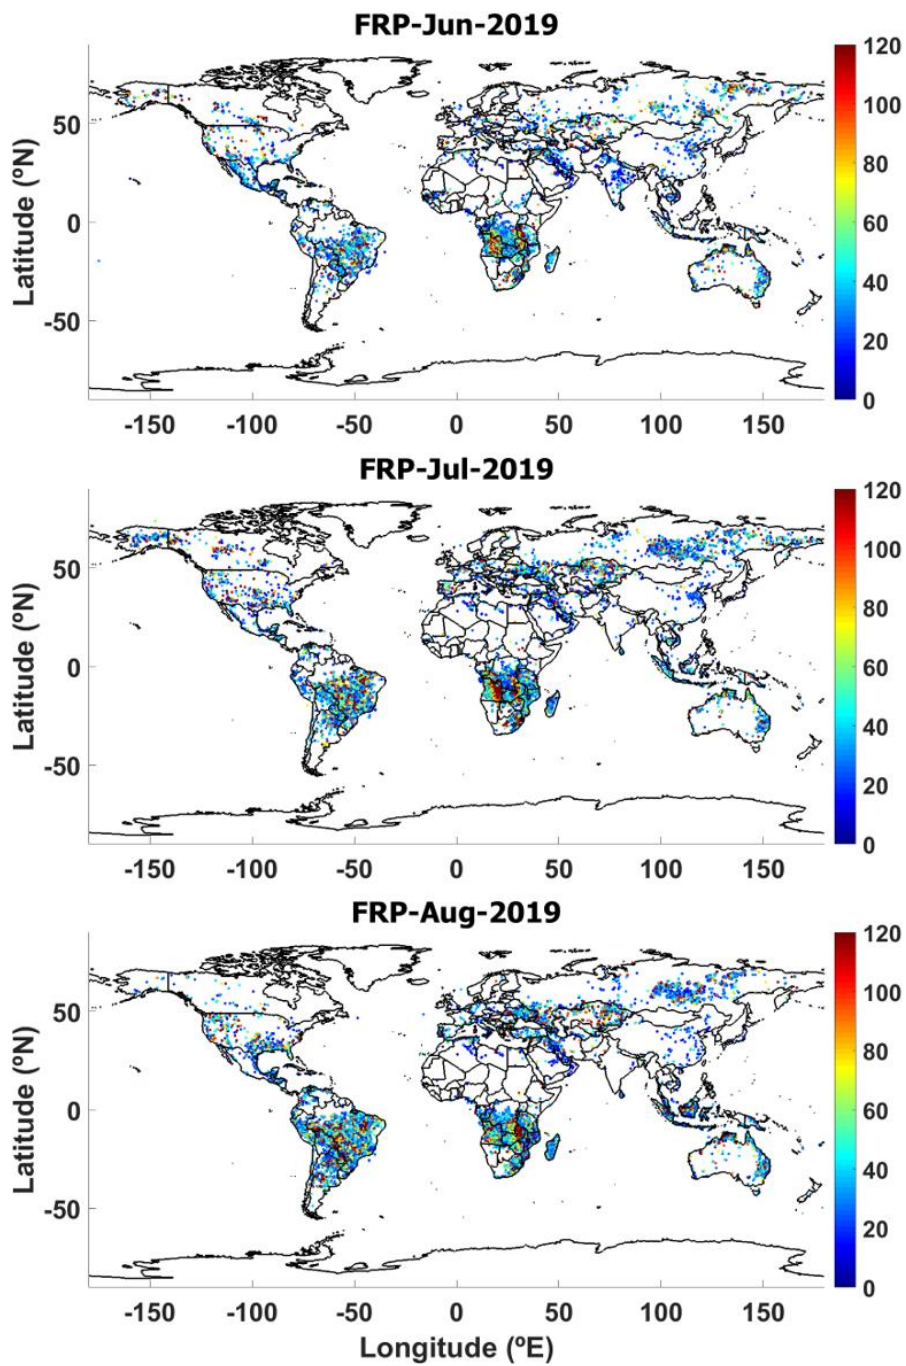

Figure S9: Fire radiative power (FRP, in MW) during JJA.

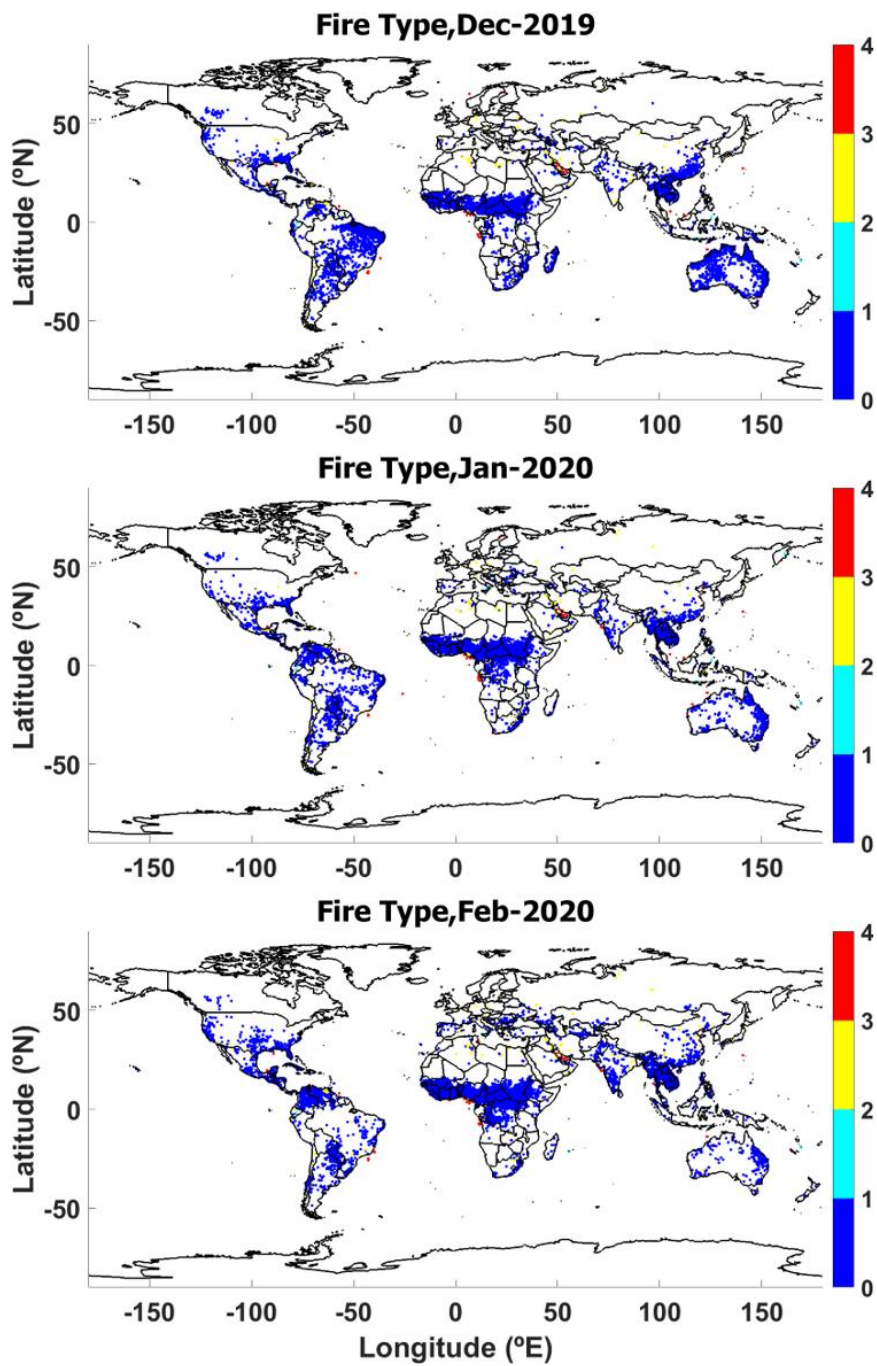

Figure S10: Fire type during DJF; 1 - vegetation fire, 2 - active volcano, 3 - static land shore and 4 - offshore.



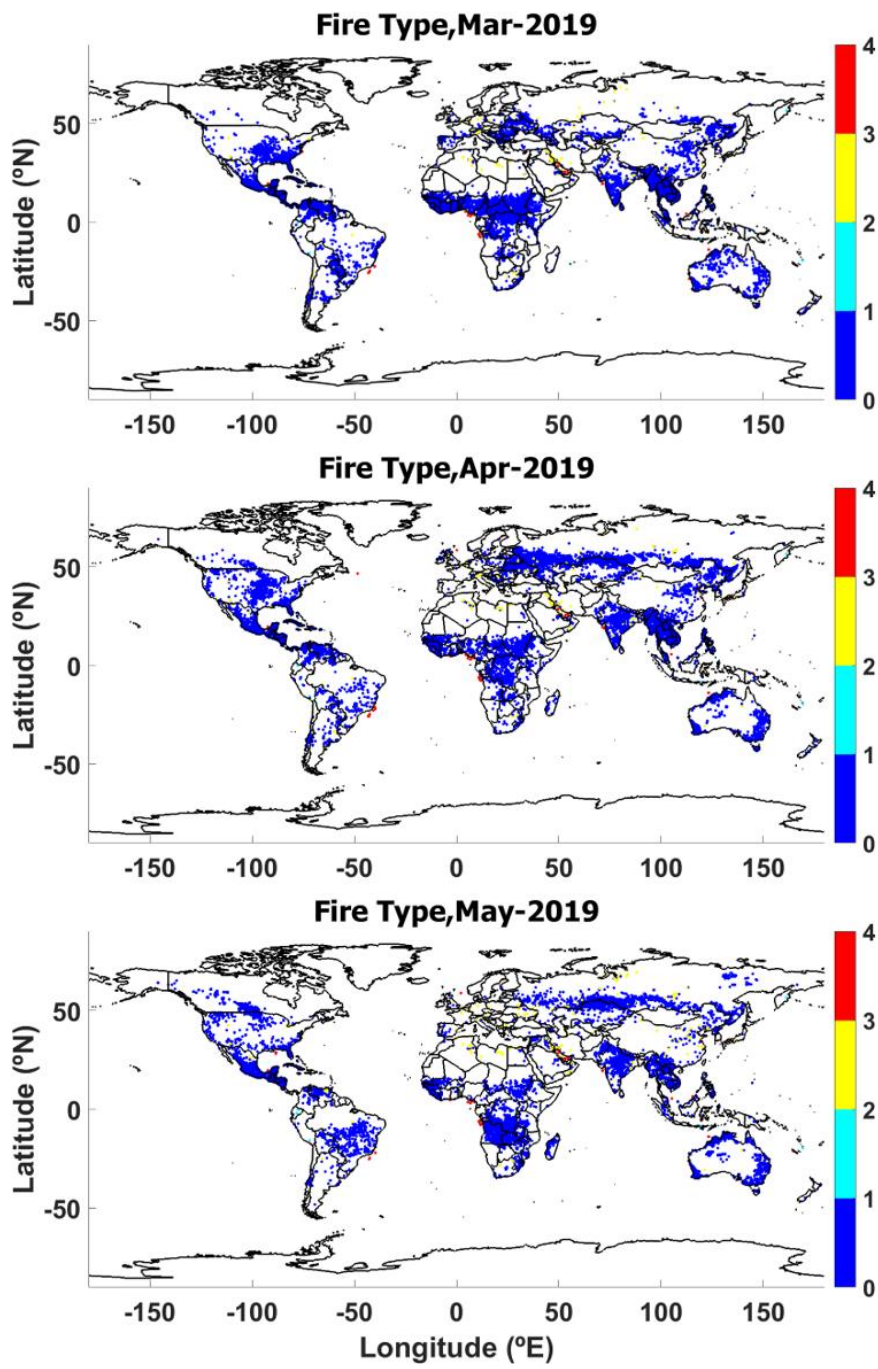

Figure S11: Fire type during MAM.



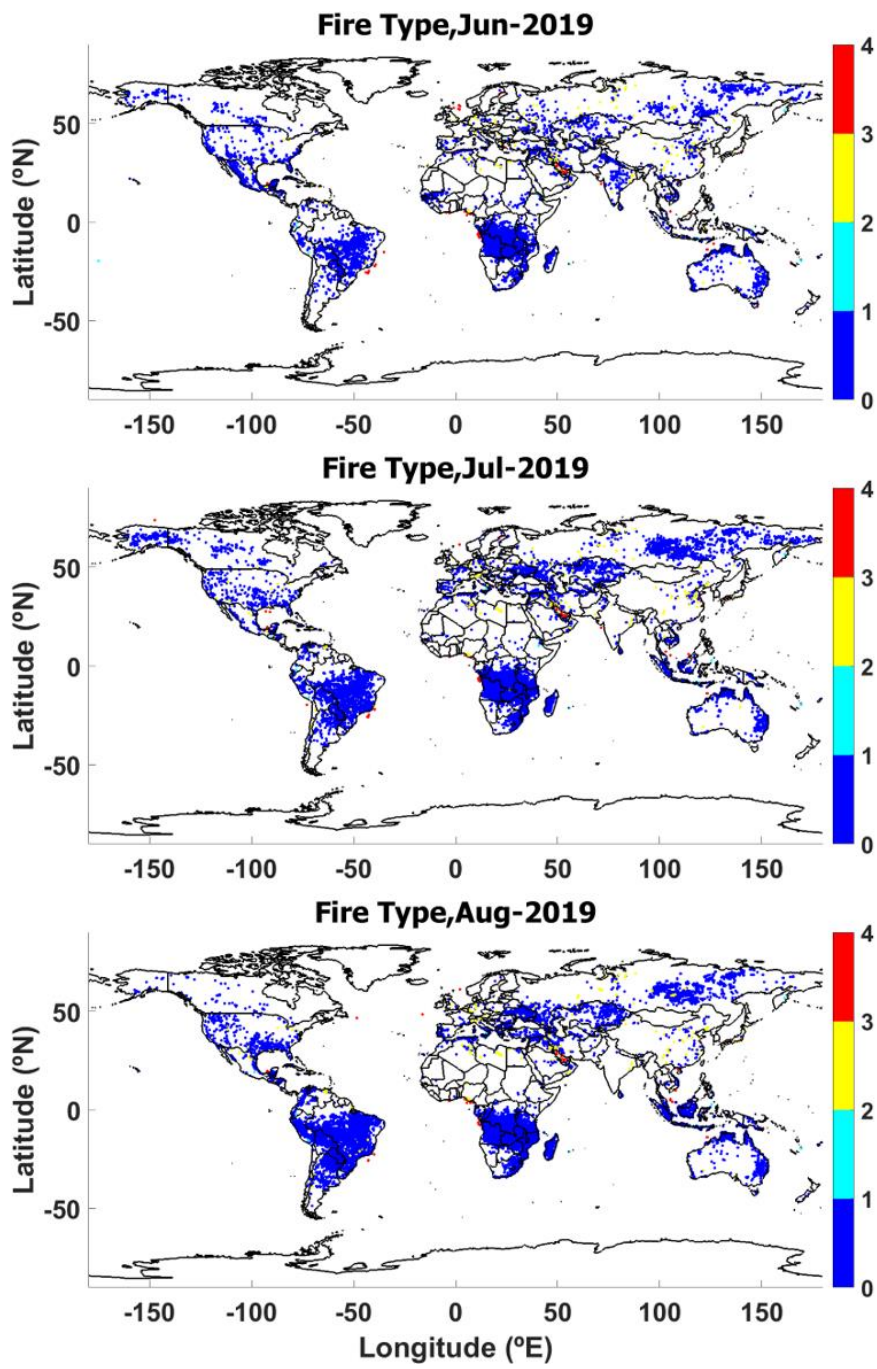

Figure S12: Fire type during JJA.
